# Supplementary material
Source: publisher figshare collection journal article supplement (https://gsajournals.figshare.com/ndownloader/files/15090308)
Supplement: Supplementary file 1 [file 15090308]

**Table S3. Plasmids used and constructed in this study**

| Plasmid | Description | Reference |
| --- | --- | --- |
| pUC19 | Cloning plasmid with MCS and *bla* (*E. coli*) marker | Thermo Fischer |
| pMF272 | C-terminal GFP expression plasmid with *ccg-1* promoter targeting *his-3* locus (*N. crassa*) | (Freitag *et al.* 2004) |
| pGFP/hph/loxp | C-terminal GFP expression plasmid with endogenous promoter (*N. crassa*) | (Honda and Selker 2009) |
| pOB257 | Expression plasmid with *gpdA* promoter and *pyroA* (*A. nidulans)* and *bla* (*E. coli*) markers targeting biotin locus | This study |
| pOSB133 | *ve-1* locus under native *ve-1* promoter in *Swa*I site of pOSB113 | This study |
| pOB299 | *lea-1* ORF under *pgpdA* in *Swa*I site of pOB257 | This study |
| pOB322 | *ve-2* ORF under *pgpdA* in *Swa*I site of pOB257 | This study |
| pOB323 | *vos-1* ORF under *pgpdA* in *Swa*I site of pOB257 | This study |
| pOB531 | *ve-1* ORF fused to sGFP under *pgpdA* in *Swa*I site of pOB257 | This study |
| pOB532 | *ve-2* ORF fused to sGFP under *pgpdA* in *Swa*I site of pOB257 | This study |
| pOB533 | *vos-1* ORF fused to sGFP under *pgpdA* in *Swa*I site of pOB257 | This study |
| pOB534 | *lea-1* ORF fused to sGFP under *pgpdA* in *Swa*I site of pOB257 | This study |
| pMF272-ve1 | *Pccg-1::ve-1::sgfp::his-3* (NCU01731) | This study |
| pMF272-ve2 | *Pccg-1::ve-2::sgfp::his-3* (NCU02775) | This study |
| pMF272-vos1 | *Pccg-1::vos-1::sgfp::his-3* (NCU05964) | This study |
| pMF272-lea1 | *Pccg-1::lea-1::sgfp::his-3* (NCU00646) | This study |
| pGFP/hph/vel2 | *Pve-2::ve-2::sgfp::hph* (NCU02775) | This study |
| pGFP/hph/lea1 | *Plea-1::lea-1::sgfp::hph* (NCU00646) | This study |
|  |  |  |
